# Supplementary material
Source: PubMed Central journal article supplement (PMC5873875)

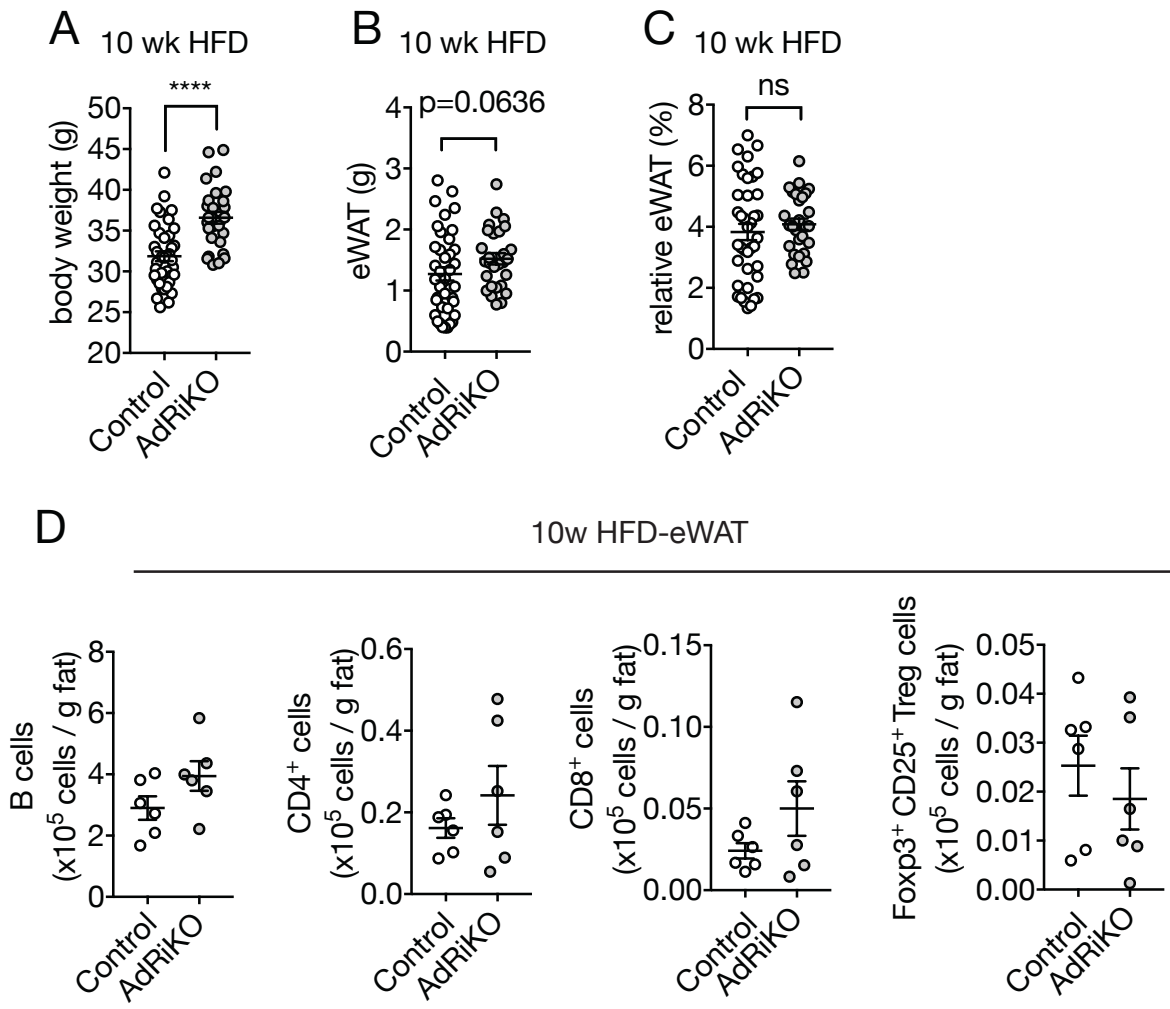

**Figure S1. Body weight and adiposity of HFD-fed control and AdRiKO mice, and B and T cells in their eWAT.**

(A and B) Body weight (A) and eWAT mass (B) of HFD-fed AdRiKO or control mice. \*\*\*\* $P < 0.0001$ , by unpaired Student's *t* test.  $n = 39$  (control) and 28 (AdRiKO).

(C) Relative eWAT mass was calculated as eWAT mass normalized to body mass. ns (not significant), by unpaired Student's *t* test.  $n = 39$  (control) and 28 (AdRiKO).

(D) Numbers of B cells (B220<sup>+</sup>) and CD4<sup>+</sup> T cells (CD3<sup>+</sup> CD4<sup>+</sup>), CD8<sup>+</sup> T cells (CD3<sup>+</sup> CD8<sup>+</sup>), and Treg (CD3<sup>+</sup> CD4<sup>+</sup> FOXP3<sup>+</sup> CD25<sup>+</sup>) cells in stromal vascular cells (SVCs) isolated from eWAT of HFD-fed AdRiKO or control mice.  $n = 6$ . Data are presented as mean  $\pm$  SEM.

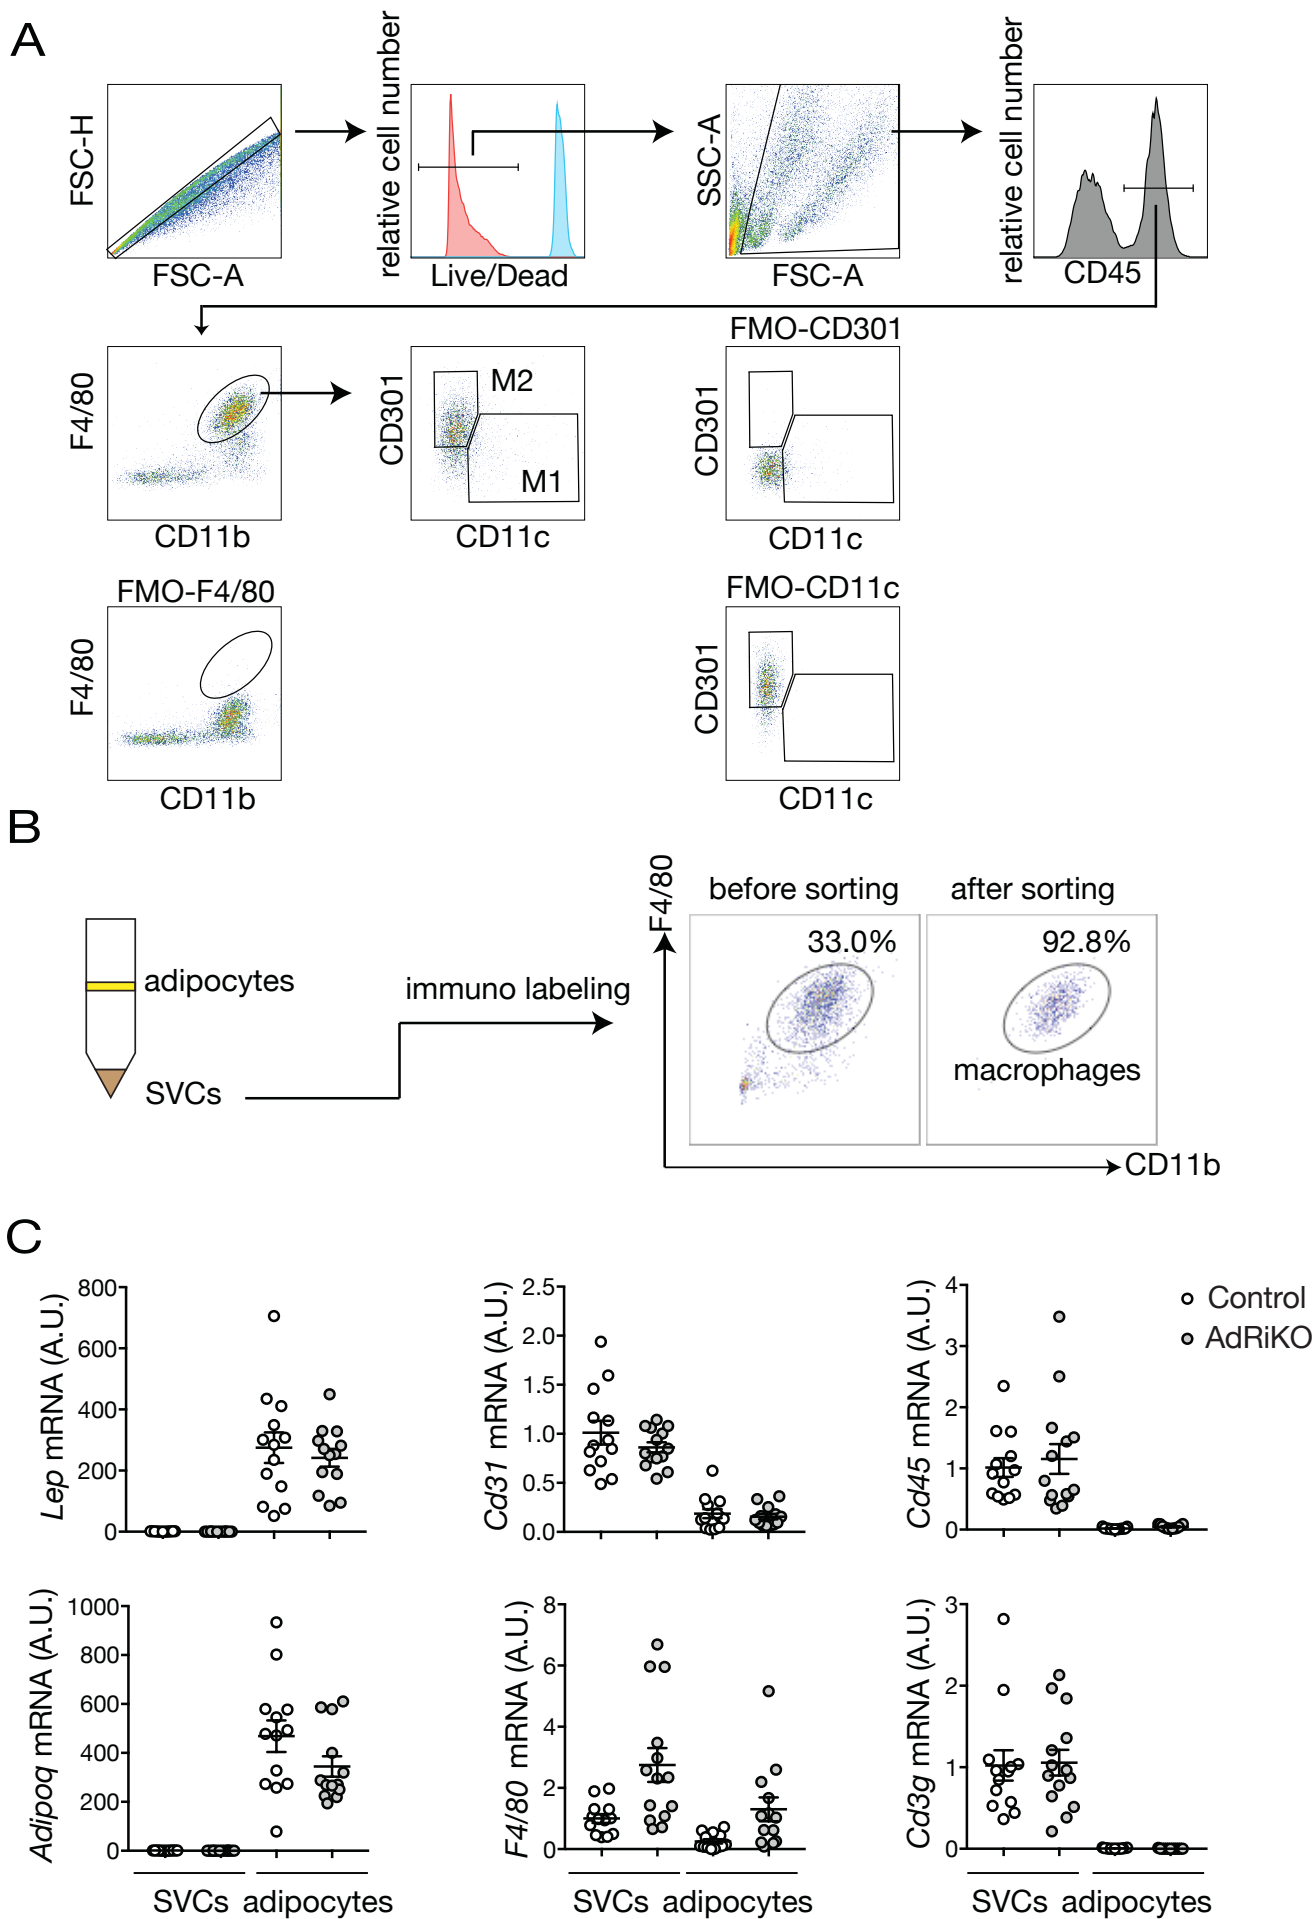

**Figure S2. FACS gating strategy for adipose tissue macrophages and isolation of SVCs and macrophages.**

(A) FACS gating. Fluorescence minus one (FMO) controls are provided to validate the specificity of the staining.

(B) Schematic view for isolation of adipocytes, SVCs, and macrophages. After low speed centrifugation, adipocytes were collected, and macrophages (CD45<sup>+</sup> F4/80<sup>+</sup> CD11b<sup>+</sup>) were sorted from SVCs.

(C) mRNA levels of *Lep*, *Adipoq*, *F4/80*, *Cd31*, *Cd45*, and *Cd3g* to validate fractionation of adipocytes and SVCs.  $n = 13-14$ . Data are presented as mean  $\pm$  SEM.

Figure S3

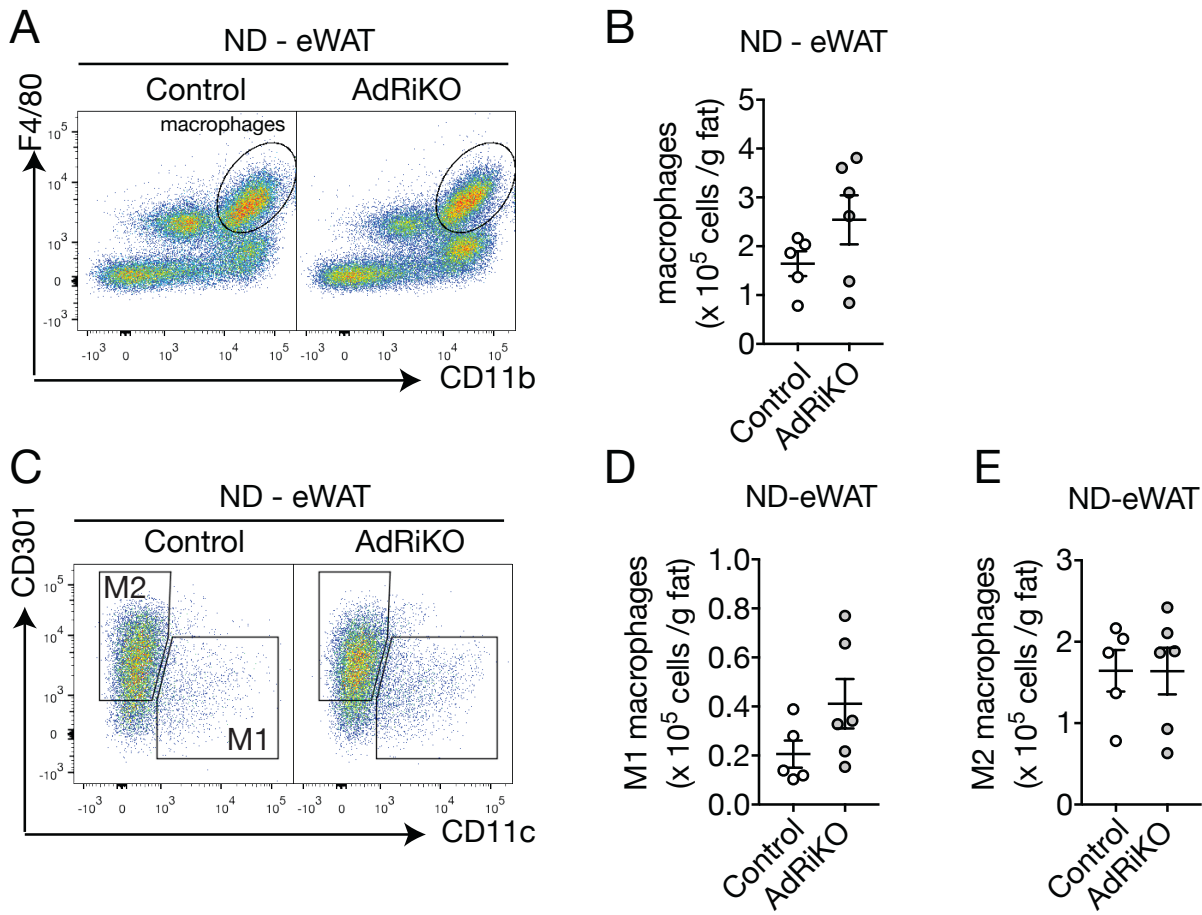

**Figure S3. AdRiKO eWAT does not accumulate macrophages in a ND-fed condition.**

(**A** and **B**) Numbers of macrophages (CD45<sup>+</sup> F4/80<sup>+</sup> CD11b<sup>+</sup>) in stromal vascular cells (SVCs) isolated from eWAT of ND-fed AdRiKO or control mice. Representative FACS profiles are shown in **A**, and quantification is shown in **B**.  $n = 5-6$ .

(**C-E**) Numbers of M1 macrophages (CD45<sup>+</sup> F4/80<sup>+</sup> CD11b<sup>+</sup> CD11c<sup>+</sup>) and M2 macrophages (CD45<sup>+</sup> F4/80<sup>+</sup> CD11b<sup>+</sup> CD301<sup>+</sup>) in SVCs from eWAT of AdRiKO or control mice fed with ND. Representative FACS profiles are shown in **C**, and quantification is shown in **D** and **E**.  $n = 5-6$ . Data are presented as mean  $\pm$  SEM.

Figure S4

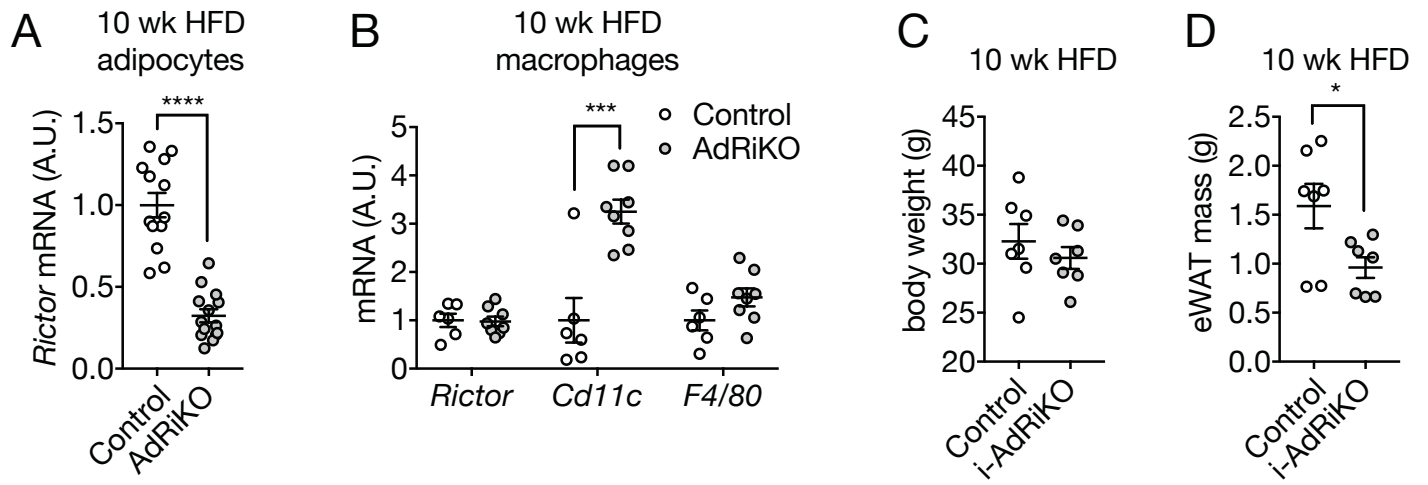

**Figure S4. Macrophage accumulation in AdRiKO eWAT is not due to confounding effects of ectopic knockout of *Rictor* in macrophages.**

(A) *Rictor* mRNA level in adipocytes isolated from HFD-fed AdRiKO or control mice.

. \*\*\*\*  $P < 0.0001$ , by unpaired Student's *t* test.  $n = 13-14$ .

(B) *Rictor*, *Cd11c*, and *F4/80* mRNA levels in macrophages isolated from HFD-fed AdRiKO or control mice. \*\*\*  $P < 0.001$ , by unpaired Student's *t* test.  $n = 6-8$ .

(C and D) Body weight (C) and eWAT mass (D) of HFD-fed i-AdRiKO or control mice. \*  $P < 0.05$ , unpaired Student's *t* test.  $n = 7$ . Data are presented as mean  $\pm$  SEM



**A**

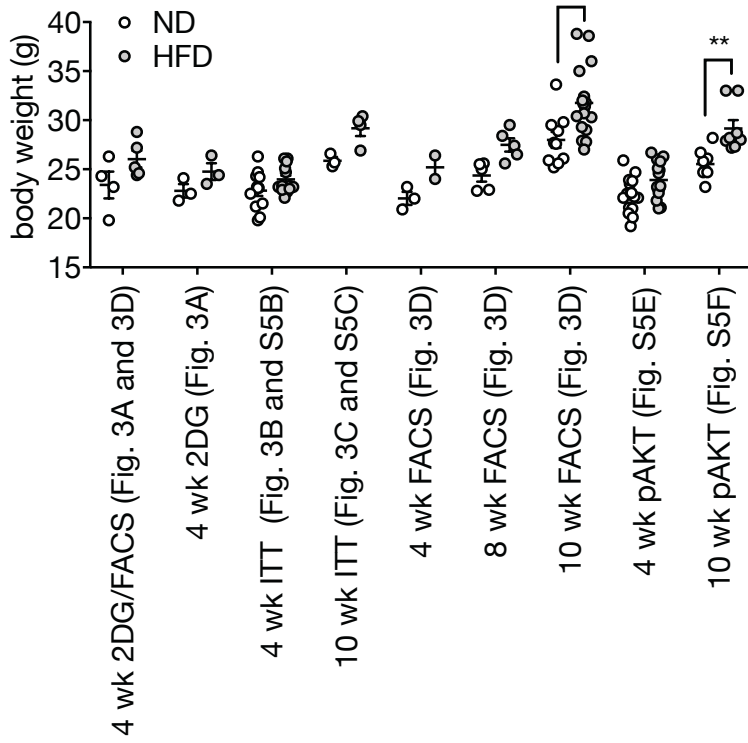

**B**

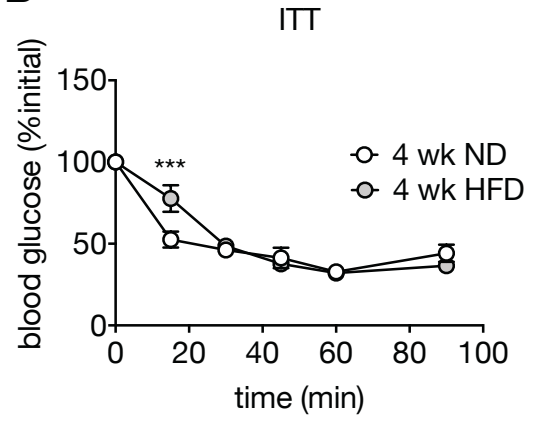

**D**

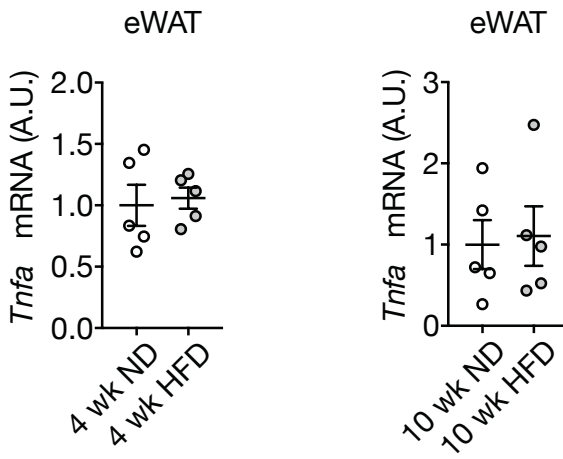

**C**

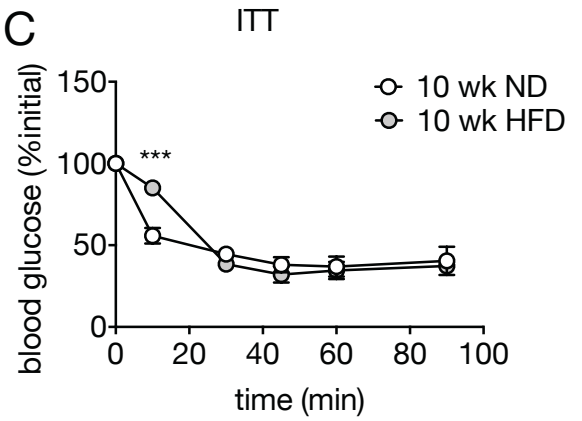

**E**

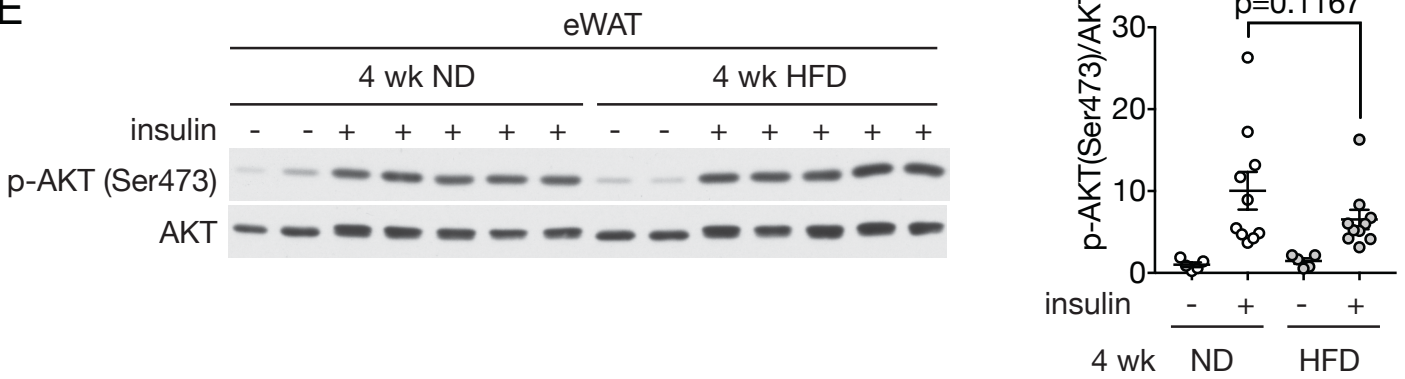

**F**

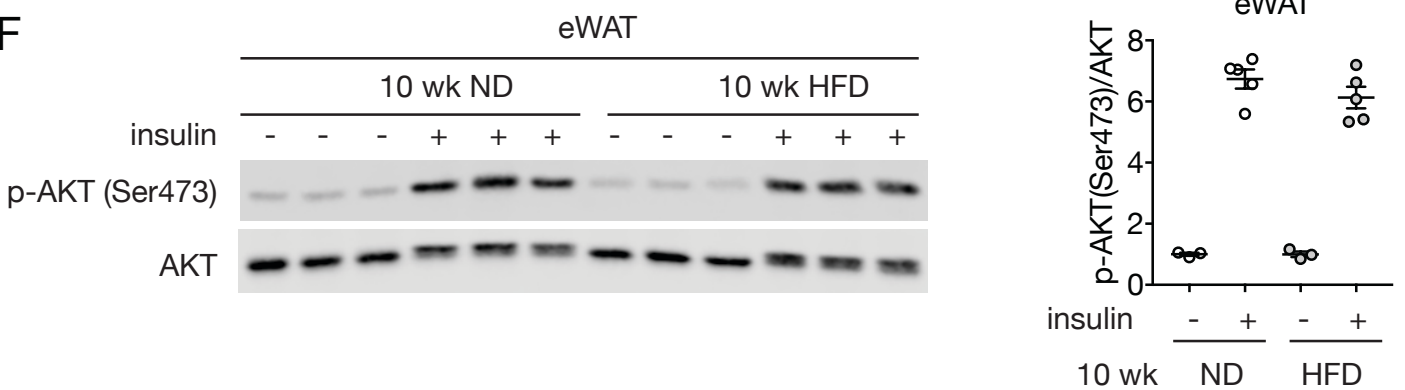

**Figure S5. Related to Figure 3.**

(A) Body weight of WT mice used for a longitudinal study. \*\*\*  $P < 0.001$ , by multiple Student's  $t$  test.

(B) ITT for WT mice fed a ND or HFD for 4 weeks. Blood glucose levels were normalized to initial glucose levels. Two-way ANOVA, \*\*\*  $P < 0.001$ , by 2-way ANOVA.  $n = 15$  (ND) and 17 (HFD).

(C) ITT for WT mice fed a ND or HFD for 10 weeks. Blood glucose levels were normalized to the initial glucose levels. \*\*\*  $P < 0.001$ , by 2-way ANOVA.  $n = 3$  (ND) and 4 (HFD).

(D) *Tnfa* mRNA level in eWAT from mice fed a ND or HFD for 4 or 10 weeks. not significant, by unpaired Student's  $t$  test.  $n = 5$ .

(E and F) Immunoblots of eWAT from WT mice fed with ND and HFD for 4 weeks (E) or 10 weeks (F). Mice were fasted for 5 hours, and then treated with PBS or insulin. p-AKT (Ser473) signals were normalized to AKT. 1-way ANOVA.  $n = 5-10$  (4 weeks) and  $n = 3-5$  (10 weeks). Data are presented as mean  $\pm$  SEM.

A

10 wk HFD - prWAT

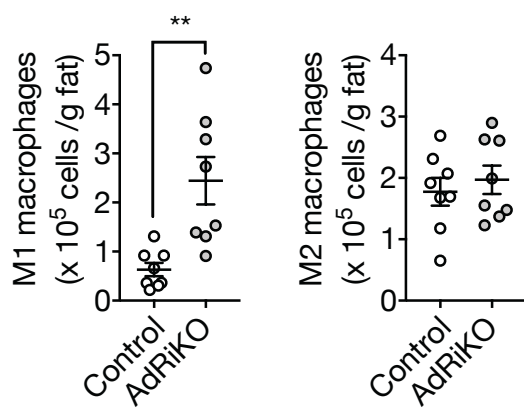

B

10 wk HFD - sWAT

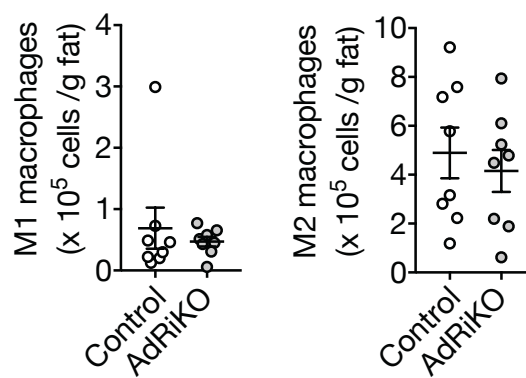

C

10 wk HFD - liver

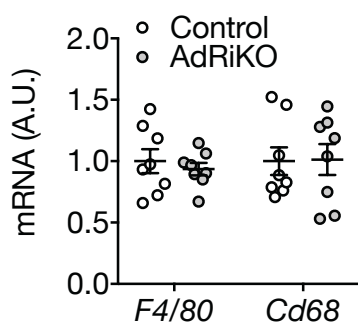

D

10 wk HFD - liver

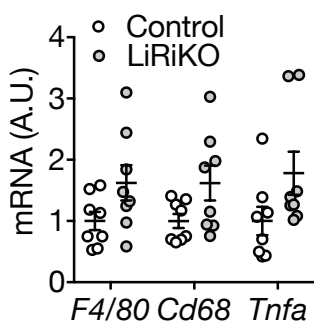

E

10 wk HFD - eWAT

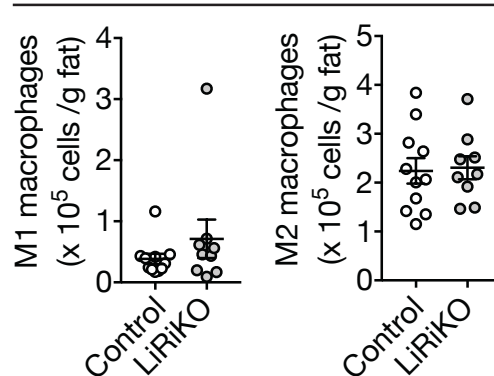

**Figure S6. Loss of insulin-mTORC2 signaling in adipocytes causes accumulation of M1 macrophages in visceral WAT.**

(A) Numbers of M1 macrophages (CD45<sup>+</sup> F4/80<sup>+</sup> CD11b<sup>+</sup> CD11c<sup>+</sup>) and M2 macrophages (CD45<sup>+</sup> F4/80<sup>+</sup> CD11b<sup>+</sup> CD301<sup>+</sup>) in SVCs isolated from peri-renal WAT (prWAT) of AdRiKO or control mice fed a HFD for 10 weeks. \*\*  $P < 0.01$ , by unpaired Student's  $t$  test.  $n = 8$ .

(B) Numbers of M1 macrophages (CD45<sup>+</sup> F4/80<sup>+</sup> CD11b<sup>+</sup> CD11c<sup>+</sup>) and M2 macrophages (CD45<sup>+</sup> F4/80<sup>+</sup> CD11b<sup>+</sup> CD301<sup>+</sup>) in SVCs isolated from subcutaneous WAT (sWAT) of AdRiKO or control mice fed a HFD for 10 weeks.  $n = 8$ .

(C) mRNA levels of *F4/80* and *Cd68* in liver of AdRiKO or control mice fed a HFD for 10 weeks.  $n = 8$ .

(D) mRNA levels of *F4/80*, *Cd68*, and *Tnfa* in liver of liver-specific *Rictor*-knockout (LiRiKO) or control mice fed a HFD for 10 weeks.  $n = 8$ .

(E) Numbers of M1 macrophages (CD45<sup>+</sup> F4/80<sup>+</sup> CD11b<sup>+</sup> CD11c<sup>+</sup>) and M2 macrophages (CD45<sup>+</sup> F4/80<sup>+</sup> CD11b<sup>+</sup> CD301<sup>+</sup>) in SVCs isolated from eWAT of LiRiKO or control mice fed a HFD for 10 weeks.  $n = 9-11$ . Data are presented as mean  $\pm$  SEM.

Figure S7

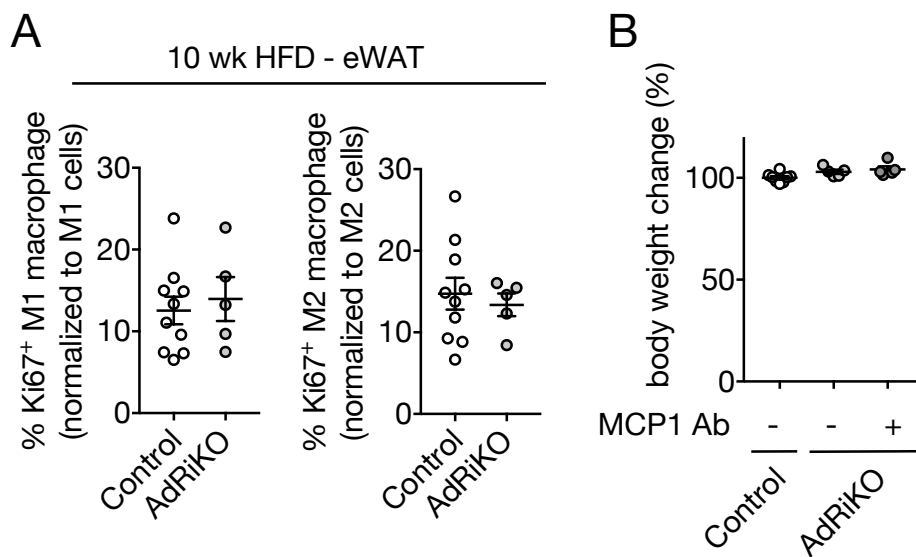

**Figure S7. Related to Figure 4. MCP1 is responsible for M1 macrophage accumulation in eWAT of AdRiKO mice fed a HFD.**

(A) Percentage of Ki67<sup>+</sup> M1 macrophages (CD45<sup>+</sup> F4/80<sup>+</sup> CD11b<sup>+</sup> CD11c<sup>+</sup> Ki67<sup>+</sup>) and M2 macrophages (CD45<sup>+</sup> F4/80<sup>+</sup> CD11b<sup>+</sup> CD301<sup>+</sup> Ki67<sup>+</sup>) in respective M1 and M2 macrophages from eWAT of AdRiKO or control mice fed a HFD for 10 weeks. *n* = 5-10.

(B) Body weight change before and after an MCP1 neutralizing antibody or control antibody treatment. *n* = 5-8.

A

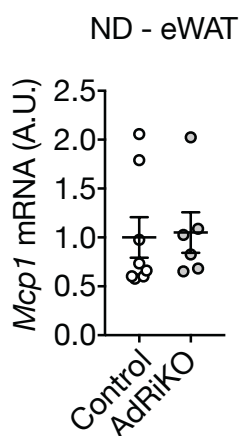

B

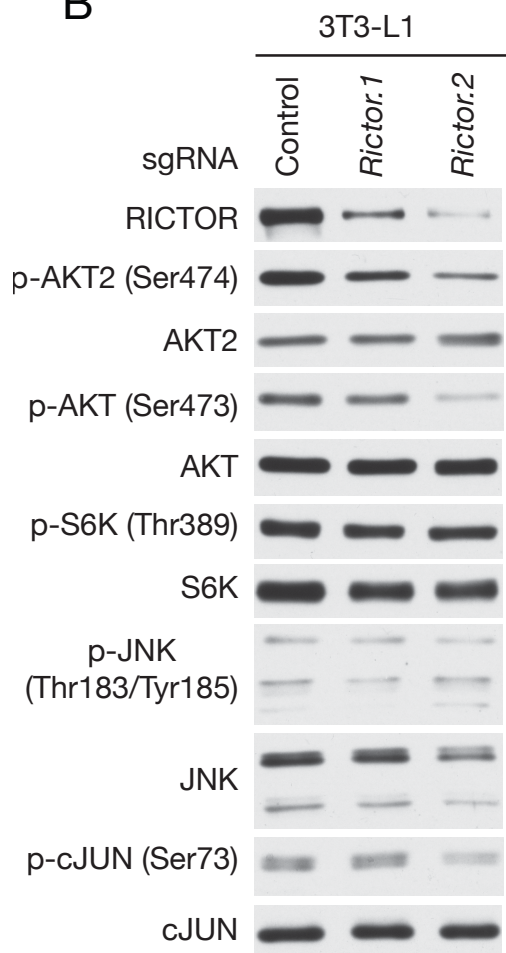

C

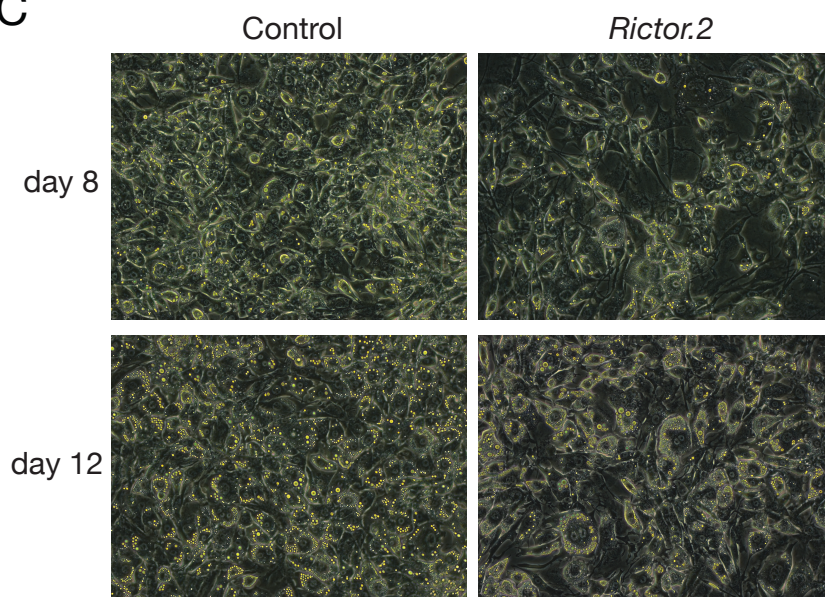

D

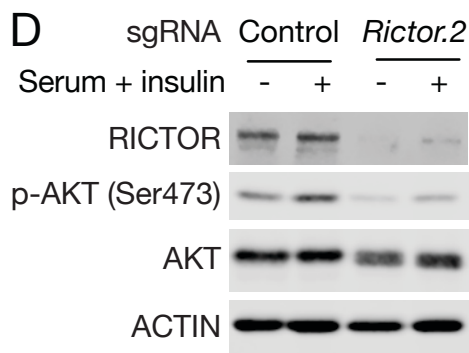

E

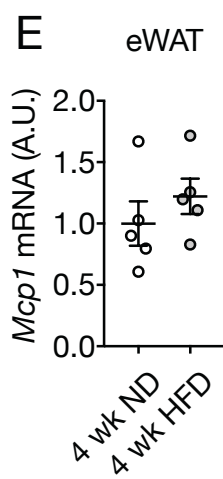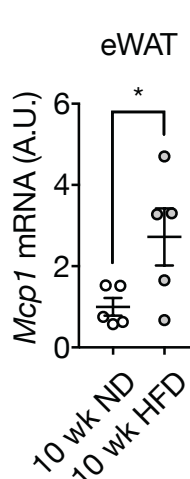

F 10 wk HFD

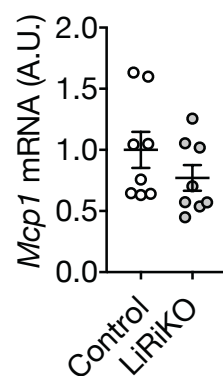

**Figure S8. Loss of insulin-mTORC2 signaling leads to *Mcp1* transcription.**

(A) *Mcp1* mRNA level in eWAT from AdRiKO or control mice fed a ND.  $n = 6-8$

(B) Immunoblots of *Rictor* knockout or control 3T3-L1 adipocytes for the indicated proteins.  $N = 3$ .

(C) Bright field images of *Rictor* knockout or control 3T3-L1 adipocytes.

(D) Immunoblots of *Rictor* knockout or control 3T3-L1 adipocytes treated with or without serum and insulin.  $N = 3$ .

(E) *Tnfa* mRNA level in eWAT from WT mice fed a ND or HFD for 4 or 10 weeks. \*  $P < 0.05$ , by unpaired Student's t test.  $n = 5$ .

(F) *Mcp1* mRNA level in liver from LiRiKO or control mice fed a HFD for 10 weeks. Not significant by unpaired Student's t test.  $n = 8$ . Data are presented as mean  $\pm$  SEM.



Figure S9

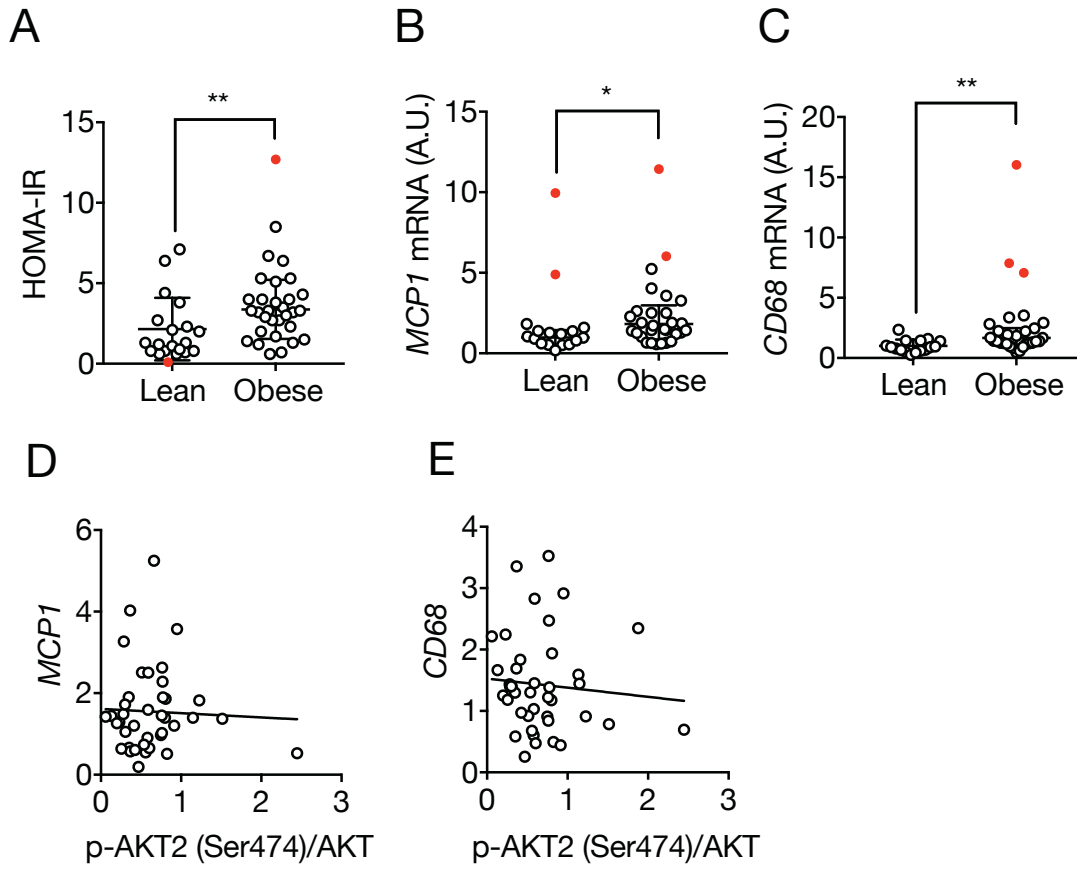

**Figure S9. Related to figure 6.**

**(A)** HOMA-IR including outliers.

Same plots as in Figure 6B but including outlier values as shown in red dots. Outliers were identified by ROUT outlier test (Q=1%). \*\*  $P < 0.01$ , by Mann-Whitney test.

**(B)** *MCPI* mRNA levels including outliers in human oWAT.

Same plots as in Figure 6F but including outlier values as shown in red dots. Outliers were identified by ROUT outlier test (Q=1%). \*  $P < 0.05$ , by Mann-Whitney test.

**(C)** *CD68* mRNA levels including outliers in human oWAT.

Same plots as in Figure 6H but including outlier values as shown in red dots. Outliers were identified by ROUT outlier test (Q=1%). \*\*  $P < 0.01$ , by Mann-Whitney test.

**(D and E)** p-AKT2 (Ser474)/AKT does not correlate with *MCPI* mRNA (D) and *CD68* (E). Pearson's correlation analysis.

Figure S10

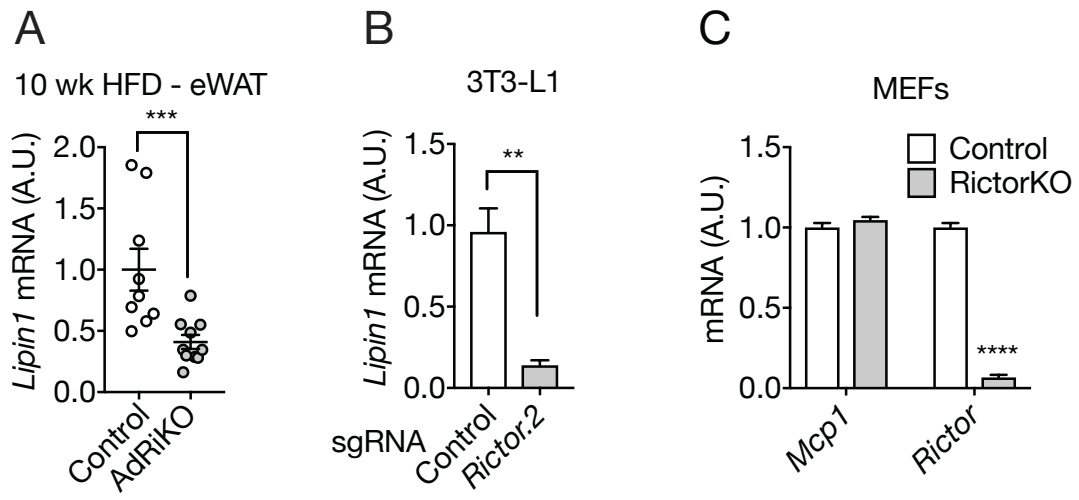

**Figure S10. *Lipin1* mRNA levels were downregulated in AdRiKO eWAT and *Rictor* knockout 3T3-L1 adipocytes.**

(A) *Lipin1* mRNA levels in eWAT from AdRiKO or control mice fed a HFD for 10 weeks. \*\*\*  $P < 0.001$ , by unpaired Student's *t* test.  $n = 9$ .

(B) *Lipin1* mRNA levels in *Rictor* knockout or control 3T3-L1 adipocytes. \*\*  $P < 0.01$ , by unpaired Student's *t* test.  $N = 3$ .

(C) *Mcp1* mRNA levels in *Rictor* knockout or control mouse embryonic fibroblasts (MEFs). \*\*\*\*  $P < 0.0001$ , by unpaired Student's *t* test.  $N = 3$ .

Unedited blots for Figure 1B

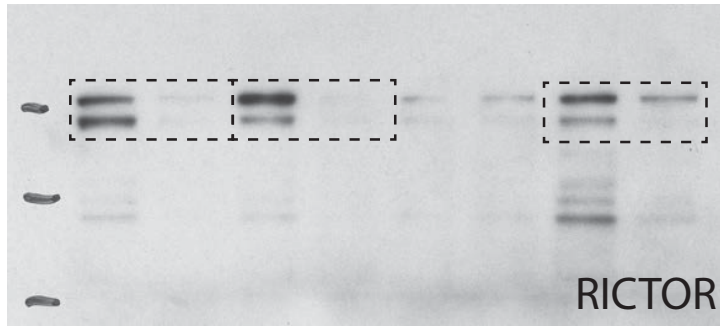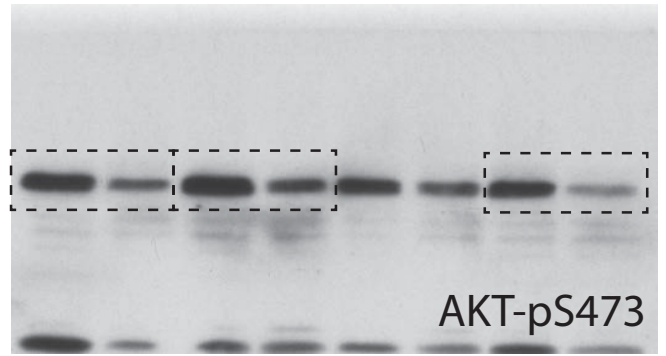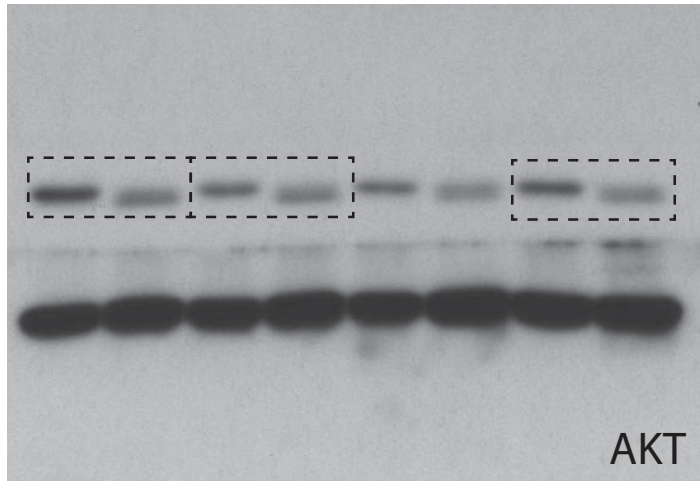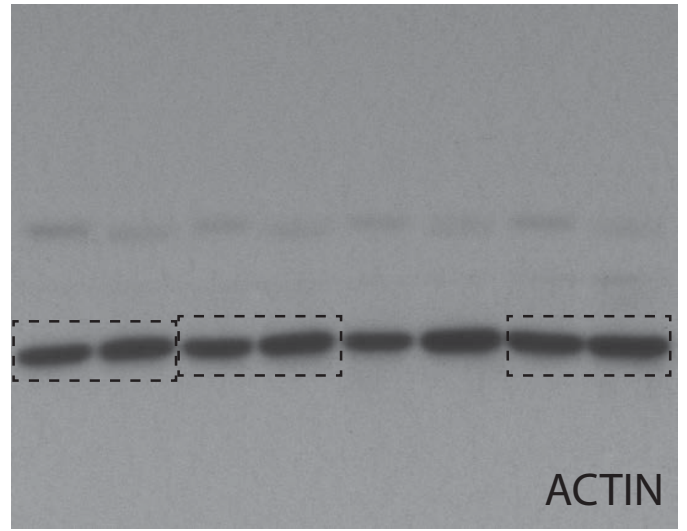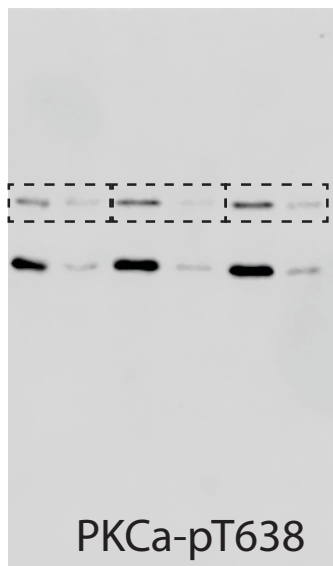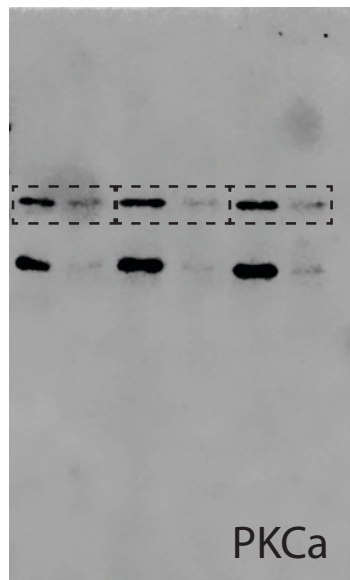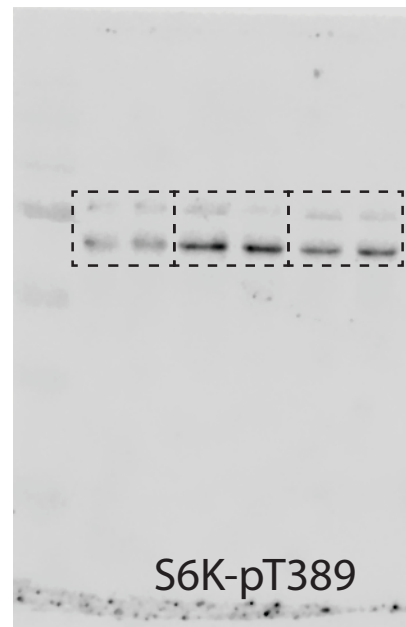

Unedited blots for Figure 2J

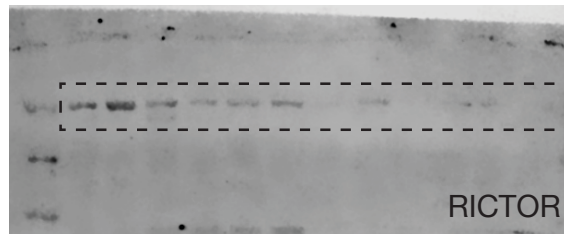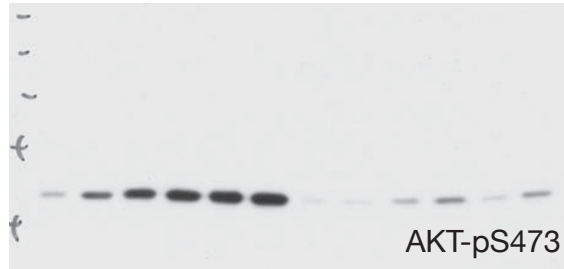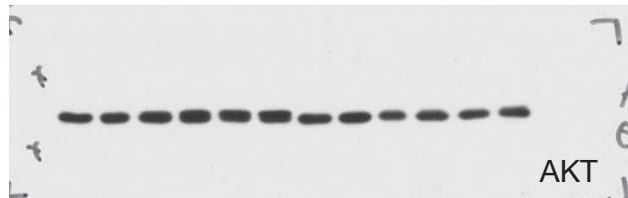

Unedited blots for Figure 4A

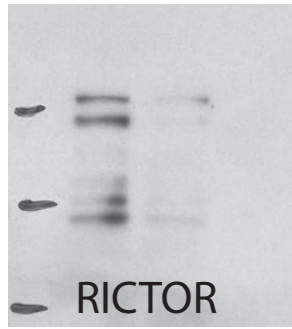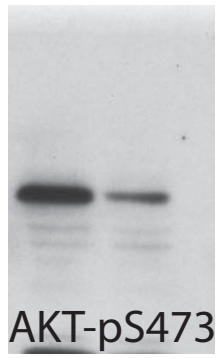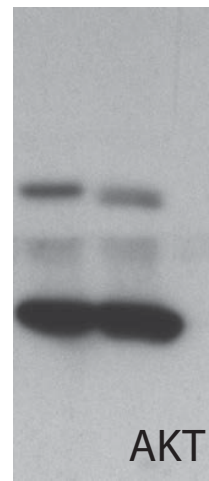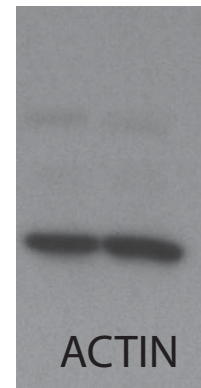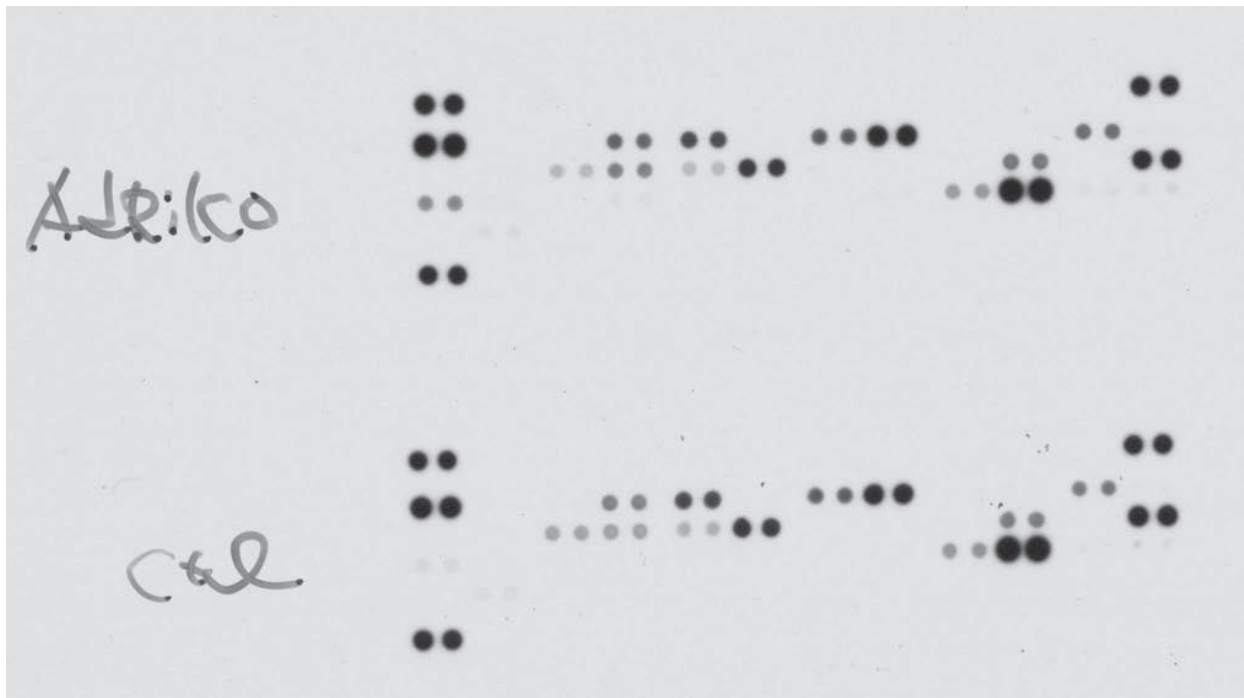

Unedited blots for Figure 5J

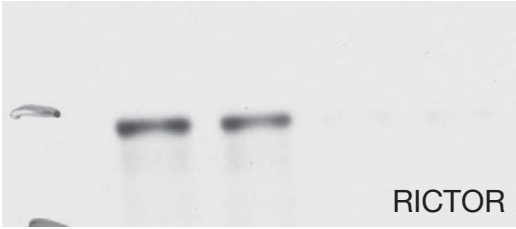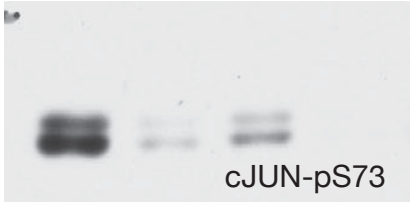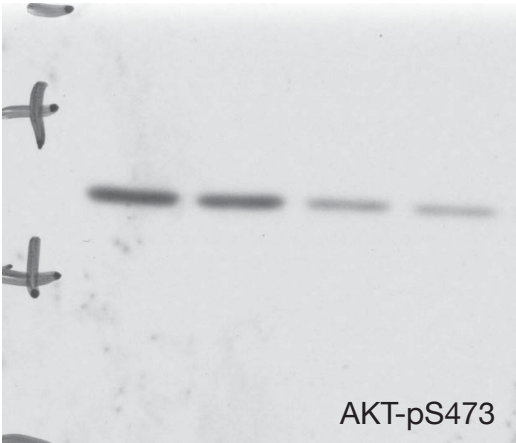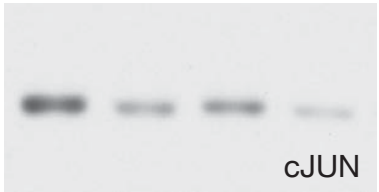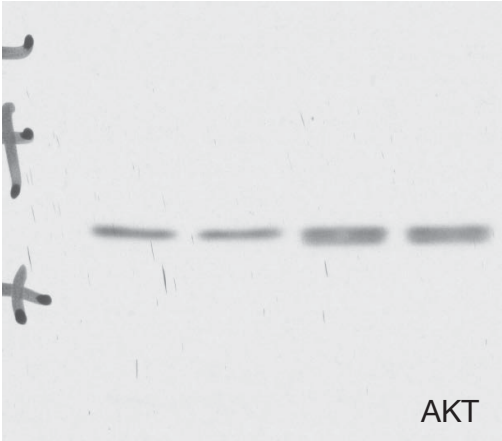



Unedited blots for Figure 5K

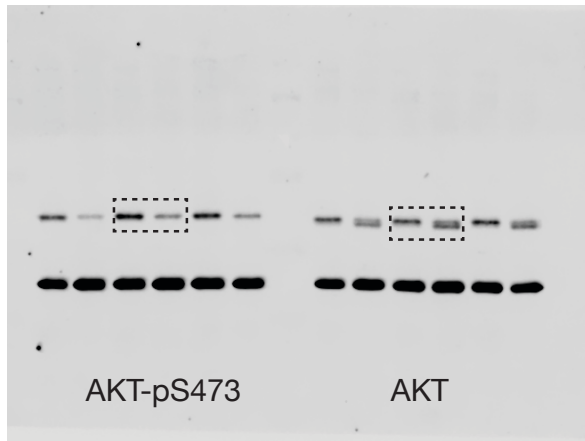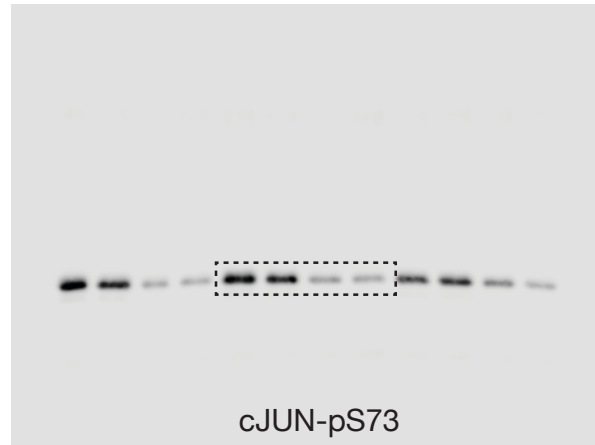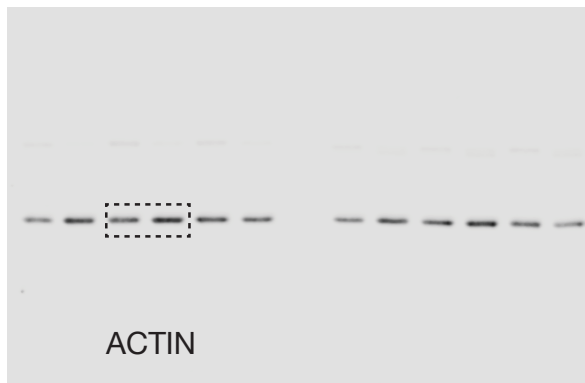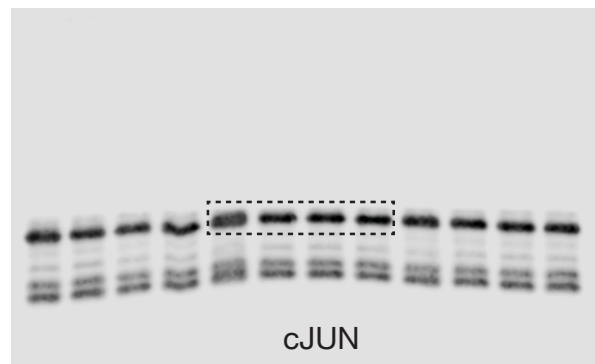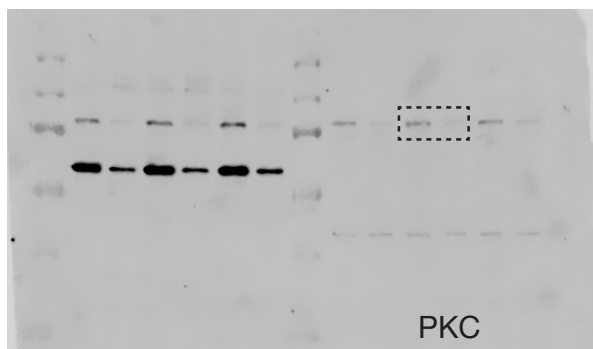

Unedited blots for Figure 6C

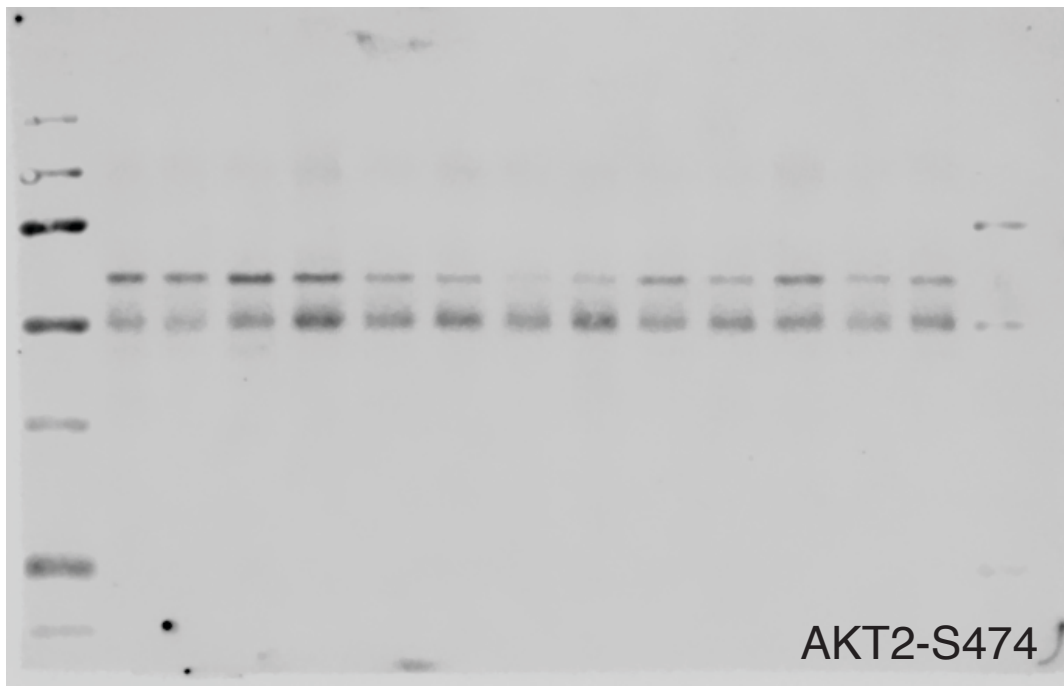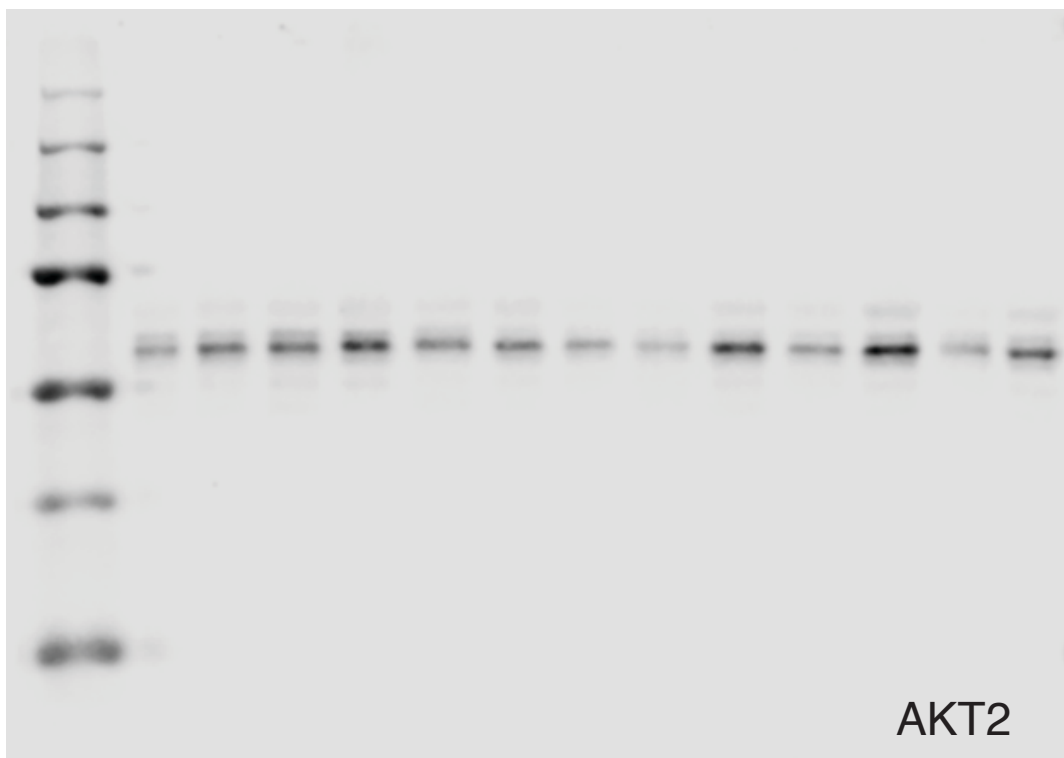

# Unedited blots for Figure 6N

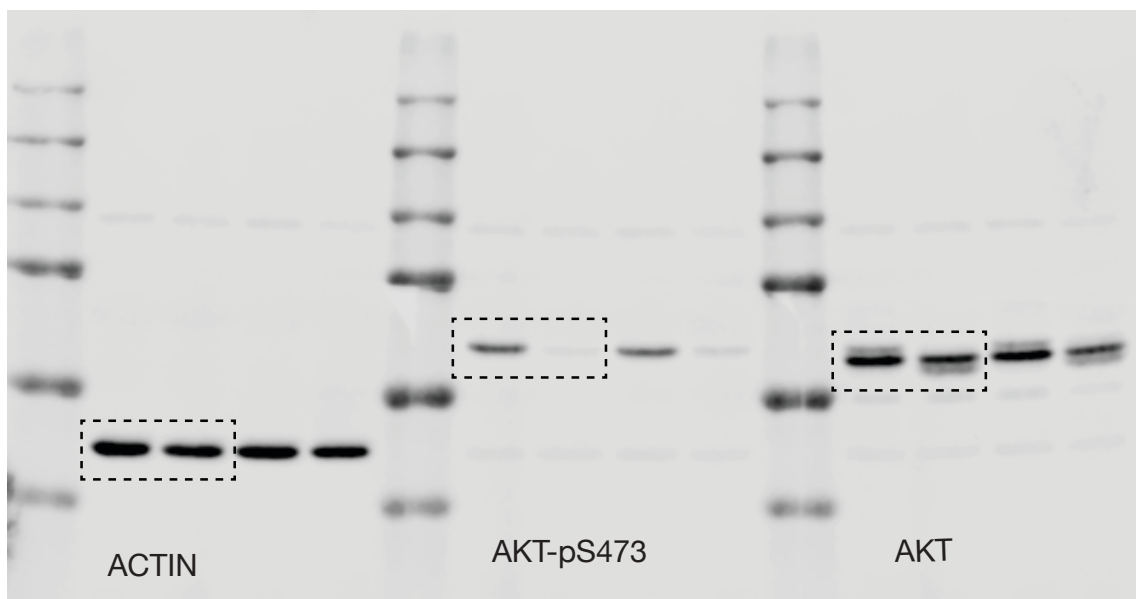

## Unedited blots for Figure S5D

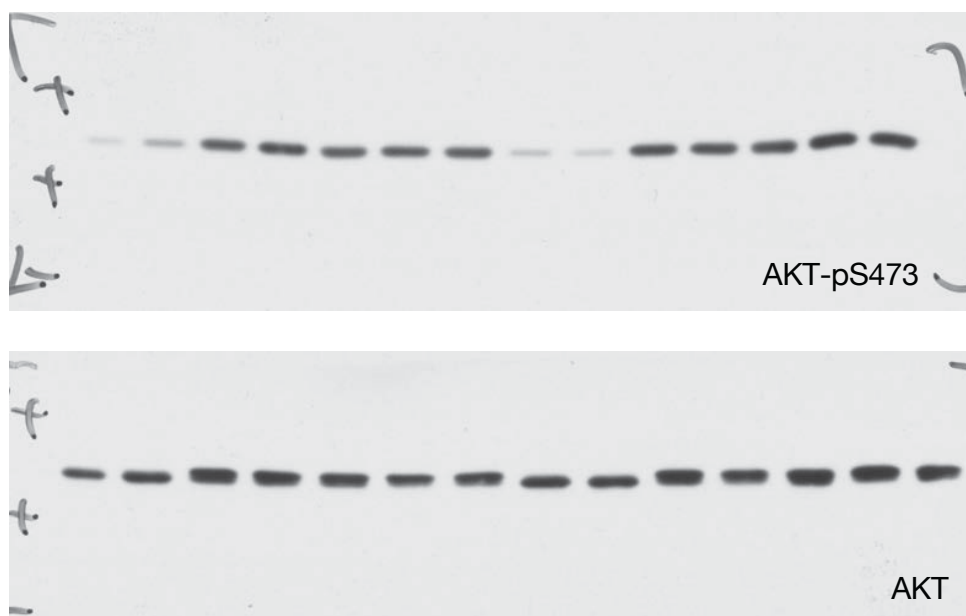

## Unedited blots for Figure S5E

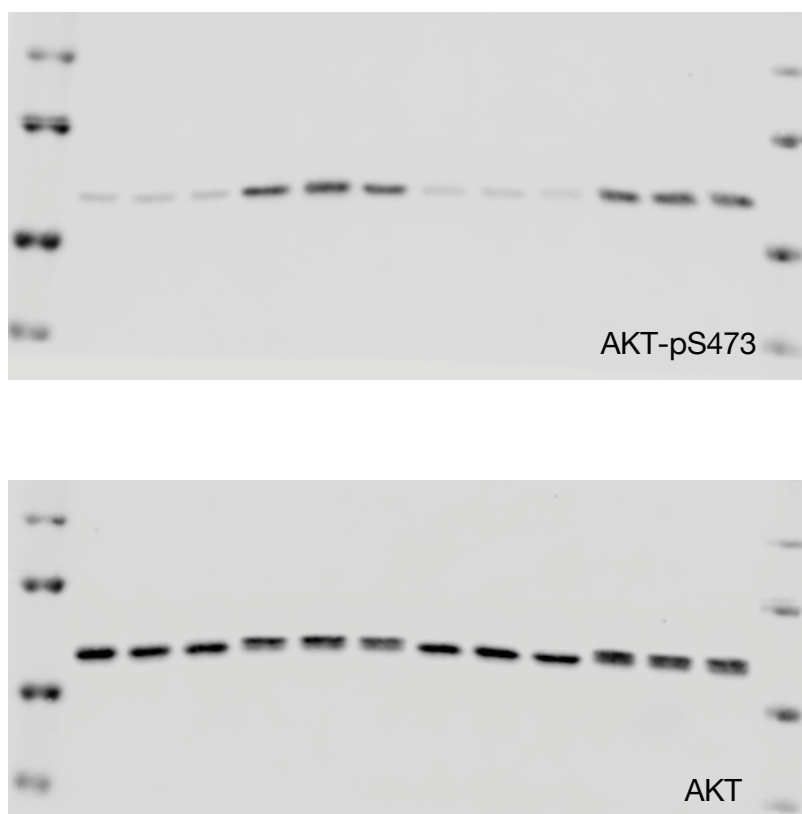

# Unedited blots for Figure S8B

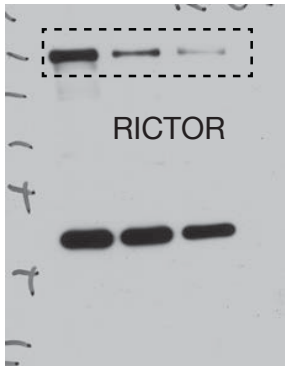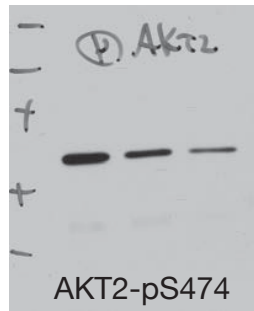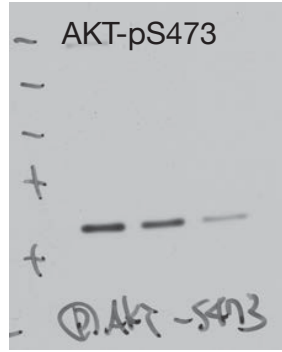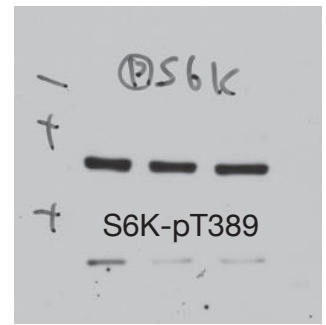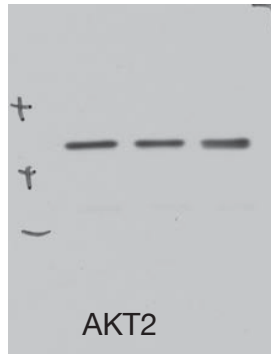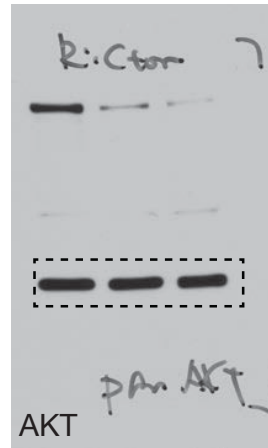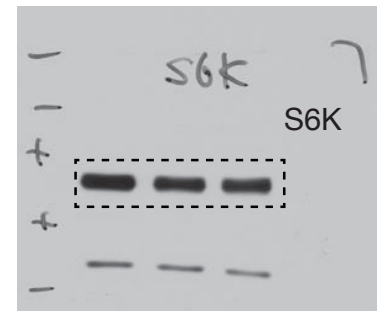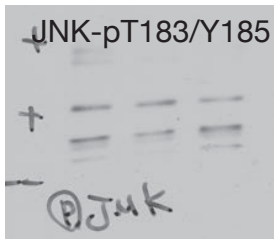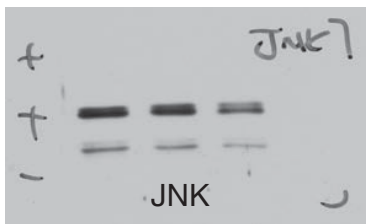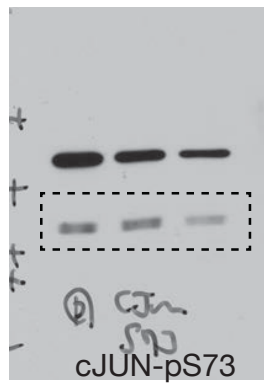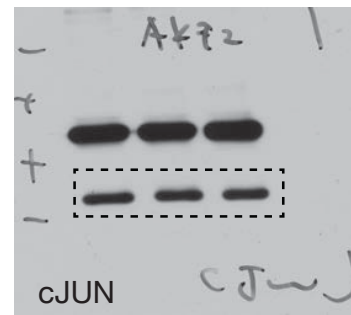

# Unedited blots for Figure D

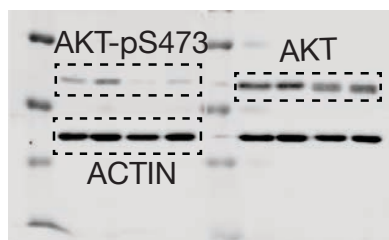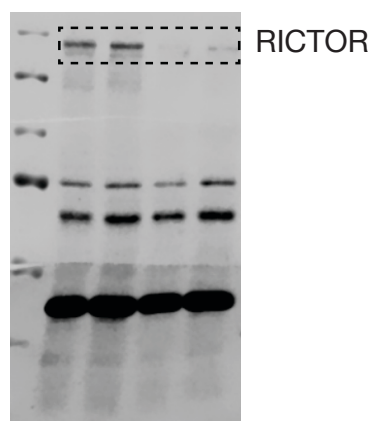

Supplement: jci-128-96139-s001.pdf [file jci-128-96139-s001.pdf]
